# Supplementary material
Source: publisher figshare collection journal article supplement (https://sage.figshare.com/ndownloader/files/21849627)
Supplement: Supplementary file 1 [file 21849627]

## **Supplementary information- Semi-structured Interview Guide**

1. In the context of working with children and families, tell me briefly, when I say engagement, what words or thoughts come to mind?
2. Can you describe for me how you know the child is engaged?
3. What are the reasons why they might be engaged?
4. Let's think about when the child is not engaged. How can you tell they are not engaged?
5. What are the reasons why they might not be engaged?
6. Let's focus more on what you do as a therapist to engage the child. How do you think you influence a child's engagement?
7. So besides what you do as a therapist, tell me about what else do you think affects or influences the child's engagement.
8. Why do you think it is important to engage children?
9. Can you describe the engagement of children at different time points of the therapy process (initial assessment, ongoing therapy or towards discharge)?
